# Supplementary material for: Carcinogenic Content of PM10-Bound PAHs in University Classrooms and Outdoors at an Urban Location in Rome, Italy, during Winter Working and Not-Working Days
Source: MDPI journal article supplement (doi:10.3390/su131910790), 2021-09-28
Supplement: s1 [file s1]

## Supplementary Materials

**Table S1**

Single profile of cPAH mixture for each period of concern, normalized to the maximum value of concentration,  $C_{\max}$  (ng/m<sup>3</sup>), for A4, CR and OUT.

| A4      |                                 |                           |                          |                             |                           |                          |                            |                             |
|---------|---------------------------------|---------------------------|--------------------------|-----------------------------|---------------------------|--------------------------|----------------------------|-----------------------------|
| Period  | $C_{\max}$ (ng/m <sup>3</sup> ) | $C_{\text{BaA}}/C_{\max}$ | $C_{\text{CH}}/C_{\max}$ | $C_{\text{Bbjkf}}/C_{\max}$ | $C_{\text{BaP}}/C_{\max}$ | $C_{\text{IP}}/C_{\max}$ | $C_{\text{DahA}}/C_{\max}$ | $C_{\text{BghiP}}/C_{\max}$ |
| P1      | 1.63                            | 0.08                      | 0.10                     | 1.00                        | 0.37                      | 0.36                     | 0.00                       | 0.58                        |
| P2      | 0.24                            | 0.18                      | 0.13                     | 0.61                        | 0.27                      | 1.00                     | 0.00                       | 0.96                        |
| P3      | 0.92                            | 0.09                      | 0.10                     | 0.58                        | 0.34                      | 0.92                     | 0.06                       | 1.00                        |
| P4      | 0.64                            | 0.15                      | 0.15                     | 0.56                        | 0.40                      | 0.81                     | 0.00                       | 1.00                        |
| P5      | 2.09                            | 0.09                      | 0.08                     | 0.52                        | 0.49                      | 0.74                     | 0.06                       | 1.00                        |
| P1      | 1.92                            | 0.09                      | 0.09                     | 1.00                        | 0.39                      | 0.45                     | 0.04                       | 0.61                        |
| P2      | 0.57                            | 0.16                      | 0.11                     | 0.00                        | 0.35                      | 0.69                     | 0.00                       | 1.00                        |
| P3      | 0.59                            | 0.13                      | 0.11                     | 0.23                        | 0.34                      | 0.79                     | 0.00                       | 1.00                        |
| P4      | 2.32                            | 0.08                      | 0.07                     | 0.19                        | 0.31                      | 0.84                     | 0.04                       | 1.00                        |
| P5      | 1.31                            | 0.06                      | 0.07                     | 0.51                        | 0.32                      | 0.58                     | 0.02                       | 1.00                        |
| P1      | 1.82                            | 0.09                      | 0.10                     | 1.00                        | 0.44                      | 0.41                     | 0.06                       | 0.63                        |
| P2      | 0.91                            | 0.05                      | 0.16                     | 0.90                        | 0.32                      | 0.83                     | 0.00                       | 1.00                        |
| P3      | 3.39                            | 0.11                      | 0.11                     | 0.71                        | 0.55                      | 0.74                     | 0.05                       | 1.00                        |
| P4      | 1.11                            | 0.13                      | 0.14                     | 0.79                        | 0.44                      | 0.60                     | 0.00                       | 1.00                        |
| P5      | 3.54                            | 0.10                      | 0.10                     | 0.68                        | 0.55                      | 0.75                     | 0.05                       | 1.00                        |
| P1      | 0.63                            | 0.08                      | 0.10                     | 1.00                        | 0.26                      | 0.42                     | 0.03                       | 0.72                        |
| P2      | 0.49                            | 0.00                      | 0.12                     | 0.65                        | 0.06                      | 0.72                     | 0.00                       | 1.00                        |
| P3      | 1.73                            | 0.12                      | 0.13                     | 0.78                        | 0.59                      | 0.85                     | 0.00                       | 1.00                        |
| P4      | 0.48                            | 0.08                      | 0.16                     | 0.85                        | 0.40                      | 0.77                     | 0.00                       | 1.00                        |
| P5      | 3.06                            | 0.10                      | 0.10                     | 0.69                        | 0.62                      | 0.66                     | 0.03                       | 1.00                        |
| P1      | 2.94                            | 0.10                      | 0.12                     | 1.00                        | 0.36                      | 0.32                     | 0.04                       | 0.43                        |
| P2      | 0.75                            | 0.03                      | 0.19                     | 1.00                        | 0.25                      | 0.76                     | 0.00                       | 0.95                        |
| P3      | 3.33                            | 0.14                      | 0.15                     | 0.94                        | 0.78                      | 0.97                     | 0.04                       | 1.00                        |
| P4      | 1.62                            | 0.14                      | 0.16                     | 0.93                        | 0.51                      | 0.78                     | 0.02                       | 1.00                        |
| P5      | 5.22                            | 0.13                      | 0.10                     | 0.66                        | 0.52                      | 0.46                     | 0.04                       | 1.00                        |
| P1      | 1.20                            | 0.08                      | 0.10                     | 1.00                        | 0.28                      | 0.35                     | 0.04                       | 0.52                        |
| P2      | 1.00                            | 0.03                      | 0.16                     | 0.81                        | 0.28                      | 0.80                     | 0.00                       | 1.00                        |
| P3      | 0.15                            | 0.00                      | 0.00                     | 0.32                        | 0.00                      | 1.00                     | 0.00                       | 0.96                        |
| P4      | 0.32                            | 0.00                      | 0.08                     | 0.60                        | 0.00                      | 0.53                     | 0.00                       | 1.00                        |
| P5      | 1.34                            | 0.12                      | 0.12                     | 1.00                        | 0.72                      | 0.68                     | 0.03                       | 1.00                        |
| P1      | 1.20                            | 0.08                      | 0.09                     | 1.00                        | 0.29                      | 0.34                     | 0.04                       | 0.47                        |
| Average | 1.56                            | 0.09                      | 0.11                     | 0.73                        | 0.38                      | 0.67                     | 0.02                       | 0.90                        |

## CR

| Period  | $C_{\max}$ (ng/m <sup>3</sup> ) | $C_{\text{BaA}}/C_{\max}$ | $C_{\text{CH}}/C_{\max}$ | $C_{\text{BbJkf}}/C_{\max}$ | $C_{\text{BaP}}/C_{\max}$ | $C_{\text{IP}}/C_{\max}$ | $C_{\text{DahA}}/C_{\max}$ | $C_{\text{BghiP}}/C_{\max}$ |
|---------|---------------------------------|---------------------------|--------------------------|-----------------------------|---------------------------|--------------------------|----------------------------|-----------------------------|
| P1      | 1.66                            | 0.09                      | 0.09                     | 1.00                        | 0.32                      | 0.39                     | 0.05                       | 0.54                        |
| P2      | 0.40                            | 0.18                      | 0.19                     | 1.00                        | 0.50                      | 0.71                     | 0.15                       | 0.92                        |
| P3      | 1.83                            | 0.11                      | 0.13                     | 1.00                        | 0.43                      | 0.75                     | 0.05                       | 0.95                        |
| P4      | 0.56                            | 0.17                      | 0.16                     | 0.76                        | 0.50                      | 0.81                     | 0.00                       | 1.00                        |
| P5      | 2.73                            | 0.10                      | 0.10                     | 0.72                        | 0.47                      | 0.70                     | 0.04                       | 1.00                        |
| P1      | 2.60                            | 0.10                      | 0.10                     | 0.72                        | 0.47                      | 0.70                     | 0.04                       | 1.00                        |
| P2      | 0.99                            | 0.11                      | 0.10                     | 0.57                        | 0.34                      | 0.56                     | 0.00                       | 1.00                        |
| P3      | 0.84                            | 0.10                      | 0.11                     | 0.68                        | 0.35                      | 0.77                     | 0.03                       | 1.00                        |
| P4      | 0.68                            | 0.16                      | 0.16                     | 0.92                        | 0.39                      | 0.56                     | 0.04                       | 1.00                        |
| P5      | 2.31                            | 0.09                      | 0.10                     | 0.54                        | 0.39                      | 0.65                     | 0.04                       | 1.00                        |
| P1      | 2.10                            | 0.09                      | 0.10                     | 1.00                        | 0.44                      | 0.44                     | 0.04                       | 0.69                        |
| P2      | 1.98                            | 0.12                      | 0.15                     | 0.79                        | 0.46                      | 0.77                     | 0.04                       | 1.00                        |
| P3      | 9.69                            | 0.11                      | 0.09                     | 0.60                        | 0.66                      | 0.75                     | 0.07                       | 1.00                        |
| P4      | 3.94                            | 0.14                      | 0.12                     | 0.55                        | 0.49                      | 0.85                     | 0.04                       | 1.00                        |
| P5      | 7.90                            | 0.09                      | 0.09                     | 0.53                        | 0.56                      | 0.75                     | 0.06                       | 1.00                        |
| P1      | 1.03                            | 0.09                      | 0.10                     | 1.00                        | 0.35                      | 0.42                     | 0.05                       | 0.85                        |
| P2      | 1.38                            | 0.18                      | 0.18                     | 0.32                        | 0.47                      | 1.00                     | 0.00                       | 0.88                        |
| P3      | 4.48                            | 0.14                      | 0.13                     | 0.51                        | 0.71                      | 0.95                     | 0.08                       | 1.00                        |
| P4      | 1.91                            | 0.19                      | 0.14                     | 0.33                        | 0.55                      | 0.76                     | 0.04                       | 1.00                        |
| P5      | 1.04                            | 0.13                      | 0.12                     | 0.64                        | 0.79                      | 0.45                     | 0.08                       | 1.00                        |
| P1      | 4.17                            | 0.10                      | 0.12                     | 1.00                        | 0.34                      | 0.30                     | 0.04                       | 0.41                        |
| P2      | 0.59                            | 0.11                      | 0.12                     | 1.00                        | 0.27                      | 0.60                     | 0.00                       | 0.53                        |
| P3      | 1.58                            | 0.13                      | 0.13                     | 0.65                        | 0.83                      | 0.78                     | 0.09                       | 1.00                        |
| P4      | 2.74                            | 0.13                      | 0.13                     | 0.50                        | 0.54                      | 0.69                     | 0.05                       | 1.00                        |
| P5      | 4.27                            | 0.15                      | 0.13                     | 0.65                        | 0.87                      | 0.74                     | 0.09                       | 1.00                        |
| P1      | 1.45                            | 0.08                      | 0.11                     | 1.00                        | 0.34                      | 0.33                     | 0.04                       | 0.50                        |
| P2      | 0.12                            | 0.26                      | 0.17                     | 0.84                        | 0.15                      | 0.40                     | 0.00                       | 1.00                        |
| P3      | 0.20                            | 0.10                      | 0.09                     | 0.76                        | 0.24                      | 0.82                     | 0.00                       | 1.00                        |
| P4      | 2.59                            | 0.14                      | 0.12                     | 0.69                        | 0.81                      | 0.83                     | 0.09                       | 1.00                        |
| P5      | 1.48                            | 0.02                      | 0.02                     | 1.00                        | 0.06                      | 0.12                     | 0.06                       | 0.14                        |
| P1      | 1.07                            | 0.17                      | 0.21                     | 1.00                        | 0.42                      | 0.72                     | 0.08                       | 0.81                        |
| Average | 2.27                            | 0.13                      | 0.12                     | 0.75                        | 0.47                      | 0.65                     | 0.05                       | 0.88                        |

## OUT

| Period  | $C_{\max}$ (ng/m <sup>3</sup> ) | $C_{\text{BaA}}/C_{\max}$ | $C_{\text{CH}}/C_{\max}$ | $C_{\text{BbJkI}}/C_{\max}$ | $C_{\text{BaP}}/C_{\max}$ | $C_{\text{I}^{\text{P}}}/C_{\max}$ | $C_{\text{DahA}}/C_{\max}$ | $C_{\text{BghiP}}/C_{\max}$ |
|---------|---------------------------------|---------------------------|--------------------------|-----------------------------|---------------------------|------------------------------------|----------------------------|-----------------------------|
| P1      | 2.67                            | 0.09                      | 0.10                     | 1.00                        | 0.30                      | 0.32                               | 0.04                       | 0.46                        |
| P2      | 0.74                            | 0.12                      | 0.11                     | 1.00                        | 0.28                      | 0.35                               | 0.00                       | 0.50                        |
| P3      | 2.83                            | 0.06                      | 0.09                     | 1.00                        | 0.26                      | 0.33                               | 0.01                       | 0.40                        |
| P4      | 0.93                            | 0.23                      | 0.11                     | 1.00                        | 0.24                      | 0.20                               | 0.35                       | 0.37                        |
| P5      | 3.75                            | 0.10                      | 0.11                     | 1.00                        | 0.29                      | 0.39                               | 0.03                       | 0.55                        |
| P1      | 2.65                            | 0.10                      | 0.11                     | 1.00                        | 0.26                      | 0.36                               | 0.03                       | 0.46                        |
| P2      | 1.11                            | 0.17                      | 0.12                     | 0.76                        | 0.44                      | 0.69                               | 0.08                       | 1.00                        |
| P3      | 1.34                            | 0.10                      | 0.09                     | 0.71                        | 0.27                      | 0.68                               | 0.06                       | 1.00                        |
| P4      | 0.88                            | 0.18                      | 0.19                     | 0.76                        | 0.32                      | 0.59                               | 0.05                       | 1.00                        |
| P5      | 2.31                            | 0.16                      | 0.17                     | 0.80                        | 0.49                      | 0.69                               | 0.06                       | 1.00                        |
| P1      | 3.26                            | 0.10                      | 0.11                     | 1.00                        | 0.42                      | 0.40                               | 0.04                       | 0.59                        |
| P2      | 2.24                            | 0.21                      | 0.33                     | 0.94                        | 0.44                      | 0.72                               | 0.24                       | 1.00                        |
| P3      | 8.30                            | 0.13                      | 0.14                     | 0.69                        | 0.50                      | 0.76                               | 0.04                       | 1.00                        |
| P4      | 4.28                            | 0.14                      | 0.14                     | 0.57                        | 1.00                      | 0.00                               | 0.00                       | 0.00                        |
| P5      | 6.89                            | 0.14                      | 0.17                     | 0.78                        | 0.50                      | 0.74                               | 0.04                       | 1.00                        |
| P1      | 0.64                            | 0.08                      | 0.12                     | 1.00                        | 0.28                      | 0.33                               | 0.03                       | 0.56                        |
| P2      | 1.25                            | 0.22                      | 0.23                     | 1.00                        | 0.45                      | 0.67                               | 0.54                       | 0.80                        |
| P3      | 1.00                            | 0.18                      | 0.16                     | 0.87                        | 0.39                      | 0.74                               | 0.09                       | 1.00                        |
| P4      | 1.32                            | 0.27                      | 0.25                     | 1.00                        | 0.55                      | 0.62                               | 0.07                       | 1.00                        |
| P5      | 5.32                            | 0.19                      | 0.21                     | 1.00                        | 0.73                      | 0.79                               | 0.04                       | 0.91                        |
| P1      | 3.56                            | 0.11                      | 0.13                     | 1.00                        | 0.30                      | 0.31                               | 0.04                       | 0.45                        |
| P2      | 1.93                            | 0.22                      | 0.28                     | 1.00                        | 0.52                      | 0.54                               | 0.08                       | 0.76                        |
| P3      | 8.12                            | 0.16                      | 0.19                     | 0.94                        | 0.82                      | 0.76                               | 0.05                       | 1.00                        |
| P4      | 4.05                            | 0.19                      | 0.24                     | 0.87                        | 0.44                      | 0.67                               | 0.04                       | 1.00                        |
| P5      | 9.08                            | 0.20                      | 0.22                     | 1.00                        | 0.62                      | 0.65                               | 0.05                       | 0.93                        |
| P1      | 1.07                            | 0.06                      | 0.09                     | 1.00                        | 0.17                      | 0.34                               | 0.04                       | 0.51                        |
| P2      | 0.56                            | 0.15                      | 0.20                     | 0.73                        | 0.22                      | 0.73                               | 0.00                       | 1.00                        |
| P3      | 0.39                            | 0.17                      | 0.21                     | 1.00                        | 0.24                      | 0.59                               | 0.00                       | 0.97                        |
| P4      | 0.49                            | 0.20                      | 0.21                     | 0.36                        | 0.15                      | 1.00                               | 0.00                       | 0.91                        |
| P5      | 2.43                            | 0.15                      | 0.16                     | 0.98                        | 0.39                      | 0.69                               | 0.09                       | 1.00                        |
| P1      | 1.71                            | 0.09                      | 0.10                     | 1.00                        | 0.28                      | 0.32                               | 0.03                       | 0.48                        |
| Average | 2.81                            | 0.15                      | 0.16                     | 0.90                        | 0.41                      | 0.55                               | 0.07                       | 0.76                        |

Table S2

Matrices of cross correlation analysis of profiles in each period of concern of cPAH mixtures normalized to the maximum value of concentration (PR<sub>Nmax</sub>).

## a. A4 vs OUT

|                       |    | OUT_PR <sub>Nmax</sub> |     |     |     |     |     |     |     |     |     |     |     |     |     |     |     |     |     |     |     |     |
|-----------------------|----|------------------------|-----|-----|-----|-----|-----|-----|-----|-----|-----|-----|-----|-----|-----|-----|-----|-----|-----|-----|-----|-----|
|                       |    | P1                     | P2  | P3  | P4  | P5  | P1  | P2  | P3  | P4  | P5  | P1  | P2  | P3  | P4  | P5  | P1  | P2  | P3  | P4  | P5  |     |
| A4_PR <sub>Nmax</sub> | P1 | 1.0                    |     |     |     |     |     |     |     |     |     |     |     |     |     |     |     |     |     |     |     |     |
|                       | P2 | 0.6                    | 1.0 |     |     |     |     |     |     |     |     |     |     |     |     |     |     |     |     |     |     |     |
|                       | P3 | 0.6                    | 1.0 | 1.0 |     |     |     |     |     |     |     |     |     |     |     |     |     |     |     |     |     |     |
|                       | P4 | 0.7                    | 1.0 | 1.0 | 1.0 |     |     |     |     |     |     |     |     |     |     |     |     |     |     |     |     |     |
|                       | P5 | 0.6                    | 0.9 | 1.0 | 1.0 | 1.0 |     |     |     |     |     |     |     |     |     |     |     |     |     |     |     |     |
|                       | P1 | 1.0                    | 0.7 | 0.7 | 0.7 | 1.0 |     |     |     |     |     |     |     |     |     |     |     |     |     |     |     |     |
|                       | P2 | 0.2                    | 0.8 | 0.8 | 0.9 | 0.3 | 1.0 |     |     |     |     |     |     |     |     |     |     |     |     |     |     |     |
|                       | P3 | 0.4                    | 0.9 | 0.9 | 1.0 | 0.9 | 0.3 | 1.0 |     |     |     |     |     |     |     |     |     |     |     |     |     |     |
|                       | P4 | 0.4                    | 0.9 | 0.9 | 1.0 | 0.9 | 0.4 | 1.0 | 1.0 |     |     |     |     |     |     |     |     |     |     |     |     |     |
|                       | P5 | 0.7                    | 0.9 | 1.0 | 1.0 | 0.7 | 0.8 | 0.9 | 0.9 | 1.0 |     |     |     |     |     |     |     |     |     |     |     |     |
|                       | P1 | 1.0                    | 0.6 | 0.7 | 0.7 | 1.0 | 0.2 | 0.4 | 0.7 | 1.0 |     |     |     |     |     |     |     |     |     |     |     |     |
|                       | P2 | 0.8                    | 0.9 | 0.9 | 0.9 | 0.6 | 0.8 | 0.8 | 0.9 | 0.9 | 1.0 | 1.0 |     |     |     |     |     |     |     |     |     |     |
|                       | P3 | 0.8                    | 0.9 | 1.0 | 1.0 | 0.8 | 0.7 | 0.8 | 0.9 | 0.9 | 1.0 | 1.0 | 1.0 |     |     |     |     |     |     |     |     |     |
|                       | P4 | 0.8                    | 0.9 | 1.0 | 1.0 | 0.8 | 0.7 | 0.8 | 1.0 | 1.0 | 1.0 | 1.0 | 1.0 | 1.0 |     |     |     |     |     |     |     |     |
|                       | P5 | 0.8                    | 0.9 | 0.9 | 0.9 | 0.7 | 0.8 | 1.0 | 0.8 | 0.9 | 1.0 | 1.0 | 1.0 | 1.0 | 1.0 |     |     |     |     |     |     |     |
|                       | P1 | 1.0                    | 0.6 | 0.6 | 1.0 | 0.1 | 0.3 | 0.3 | 0.6 | 1.0 | 0.8 | 0.7 | 1.0 | 0.7 | 0.8 | 0.7 | 1.0 | 0.9 | 0.7 | 0.8 | 0.7 | 1.0 |
|                       | P2 | 0.8                    | 0.9 | 1.0 | 0.9 | 0.8 | 0.7 | 0.8 | 1.0 | 1.0 | 1.0 | 0.9 | 1.0 | 1.0 | 0.9 | 0.7 | 1.0 | 0.9 | 0.7 | 1.0 | 0.9 | 0.8 |
|                       | P3 | 0.4                    | 1.0 | 1.0 | 0.9 | 0.5 | 0.9 | 0.8 | 0.8 | 0.6 | 0.9 | 0.8 | 0.8 | 0.3 | 0.8 | 0.8 | 0.7 | 0.4 | 0.9 | 1.0 |     |     |
|                       | P4 | 0.7                    | 0.9 | 0.9 | 0.7 | 0.8 | 0.9 | 0.9 | 0.9 | 0.8 | 1.0 | 0.9 | 0.8 | 0.9 | 0.8 | 0.9 | 0.7 | 1.0 | 0.9 | 1.0 |     |     |
|                       | P5 | 0.8                    | 0.9 | 0.9 | 0.9 | 0.6 | 0.7 | 0.9 | 0.9 | 1.0 | 1.0 | 0.9 | 0.8 | 1.0 | 0.9 | 0.8 | 0.9 | 0.7 | 1.0 | 0.9 | 1.0 |     |
|                       | P1 | 1.0                    | 0.6 | 0.6 | 1.0 | 0.1 | 0.3 | 0.3 | 0.6 | 1.0 | 0.8 | 0.7 | 1.0 | 0.7 | 0.8 | 0.7 | 1.0 | 0.9 | 0.7 | 0.8 | 0.7 | 1.0 |
|                       | P2 | 0.8                    | 0.9 | 1.0 | 1.0 | 0.8 | 0.7 | 0.8 | 1.0 | 1.0 | 1.0 | 0.9 | 1.0 | 1.0 | 0.9 | 0.7 | 1.0 | 0.9 | 0.7 | 1.0 | 0.9 | 0.8 |
|                       | P3 | 0.4                    | 1.0 | 1.0 | 0.9 | 0.5 | 0.9 | 0.8 | 0.8 | 0.6 | 0.9 | 0.8 | 0.8 | 0.3 | 0.8 | 0.8 | 0.7 | 0.4 | 0.9 | 1.0 |     |     |
|                       | P4 | 0.7                    | 0.9 | 0.9 | 0.7 | 0.8 | 0.9 | 0.9 | 0.9 | 0.8 | 1.0 | 0.9 | 0.8 | 0.9 | 0.8 | 0.9 | 0.7 | 1.0 | 0.9 | 1.0 |     |     |
|                       | P5 | 0.8                    | 0.9 | 0.9 | 0.9 | 0.6 | 0.7 | 0.9 | 0.9 | 1.0 | 1.0 | 0.9 | 0.8 | 1.0 | 0.9 | 0.8 | 0.9 | 0.7 | 1.0 | 0.9 | 1.0 |     |
|                       | P1 | 1.0                    | 0.6 | 0.6 | 1.0 | 0.1 | 0.3 | 0.3 | 0.6 | 1.0 | 0.8 | 0.7 | 1.0 | 0.7 | 0.8 | 0.7 | 1.0 | 0.9 | 0.7 | 0.8 | 0.7 | 1.0 |
|                       | P2 | 0.8                    | 0.9 | 1.0 | 1.0 | 0.8 | 0.7 | 0.8 | 1.0 | 1.0 | 1.0 | 0.9 | 1.0 | 1.0 | 0.9 | 0.7 | 1.0 | 0.9 | 0.7 | 1.0 | 0.9 | 0.8 |
|                       | P3 | 0.4                    | 1.0 | 1.0 | 0.9 | 0.5 | 0.9 | 0.8 | 0.8 | 0.6 | 0.9 | 0.8 | 0.8 | 0.3 | 0.8 | 0.8 | 0.7 | 0.4 | 0.9 | 1.0 |     |     |
|                       | P4 | 0.7                    | 0.9 | 0.9 | 0.7 | 0.8 | 0.9 | 0.9 | 0.9 | 0.8 | 1.0 | 0.9 | 0.8 | 0.9 | 0.8 | 0.9 | 0.7 | 1.0 | 0.9 | 1.0 |     |     |
|                       | P5 | 0.8                    | 0.9 | 0.9 | 0.9 | 0.6 | 0.7 | 0.9 | 0.9 | 1.0 | 1.0 | 0.9 | 0.8 | 1.0 | 0.9 | 0.8 | 0.9 | 0.7 | 1.0 | 0.9 | 1.0 |     |
|                       | P1 | 1.0                    | 0.6 | 0.6 | 1.0 | 0.1 | 0.3 | 0.3 | 0.6 | 1.0 | 0.8 | 0.7 | 1.0 | 0.7 | 0.8 | 0.7 | 1.0 | 0.9 | 0.7 | 0.8 | 0.7 | 1.0 |
|                       | P2 | 0.8                    | 0.9 | 1.0 | 1.0 | 0.8 | 0.7 | 0.8 | 1.0 | 1.0 | 1.0 | 0.9 | 1.0 | 1.0 | 0.9 | 0.7 | 1.0 | 0.9 | 0.7 | 1.0 | 0.9 | 0.8 |
|                       | P3 | 0.4                    | 1.0 | 1.0 | 0.9 | 0.5 | 0.9 | 0.8 | 0.8 | 0.6 | 0.9 | 0.8 | 0.8 | 0.3 | 0.8 | 0.8 | 0.7 | 0.4 | 0.9 | 1.0 |     |     |
|                       | P4 | 0.7                    | 0.9 | 0.9 | 0.7 | 0.8 | 0.9 | 0.9 | 0.9 | 0.8 | 1.0 | 0.9 | 0.8 | 0.9 | 0.8 | 0.9 | 0.7 | 1.0 | 0.9 | 1.0 |     |     |
|                       | P5 | 0.8                    | 0.9 | 0.9 | 0.9 | 0.6 | 0.7 | 0.9 | 0.9 | 1.0 | 1.0 | 0.9 | 0.8 | 1.0 | 0.9 | 0.8 | 0.9 | 0.7 | 1.0 | 0.9 | 1.0 |     |
|                       | P1 | 1.0                    | 0.6 | 0.6 | 1.0 | 0.1 | 0.3 | 0.3 | 0.6 | 1.0 | 0.8 | 0.7 | 1.0 | 0.7 | 0.8 | 0.7 | 1.0 | 0.9 | 0.7 | 0.8 | 0.7 | 1.0 |
|                       | P2 | 0.8                    | 0.9 | 1.0 | 1.0 | 0.8 | 0.7 | 0.8 | 1.0 | 1.0 | 1.0 | 0.9 | 1.0 | 1.0 | 0.9 | 0.7 | 1.0 | 0.9 | 0.7 | 1.0 | 0.9 | 0.8 |
|                       | P3 | 0.4                    | 1.0 | 1.0 | 0.9 | 0.5 | 0.9 | 0.8 | 0.8 | 0.6 | 0.9 | 0.8 | 0.8 | 0.3 | 0.8 | 0.8 | 0.7 | 0.4 | 0.9 | 1.0 |     |     |
|                       | P4 | 0.7                    | 0.9 | 0.9 | 0.7 | 0.8 | 0.9 | 0.9 | 0.9 | 0.8 | 1.0 | 0.9 | 0.8 | 0.9 | 0.8 | 0.9 | 0.7 | 1.0 | 0.9 | 1.0 |     |     |
|                       | P5 | 0.8                    | 0.9 | 0.9 | 0.9 | 0.6 | 0.7 | 0.9 | 0.9 | 1.0 | 1.0 | 0.9 | 0.8 | 1.0 | 0.9 | 0.8 | 0.9 | 0.7 | 1.0 | 0.9 | 1.0 |     |
|                       | P1 | 1.0                    | 0.6 | 0.6 | 1.0 | 0.1 | 0.3 | 0.3 | 0.6 | 1.0 | 0.8 | 0.7 | 1.0 | 0.7 | 0.8 | 0.7 | 1.0 | 0.9 | 0.7 | 0.8 | 0.7 | 1.0 |
|                       | P2 | 0.8                    | 0.9 | 1.0 | 1.0 | 0.8 | 0.7 | 0.8 | 1.0 | 1.0 | 1.0 | 0.9 | 1.0 | 1.0 | 0.9 | 0.7 | 1.0 | 0.9 | 0.7 | 1.0 | 0.9 | 0.8 |
|                       | P3 | 0.4                    | 1.0 | 1.0 | 0.9 | 0.5 | 0.9 | 0.8 | 0.8 | 0.6 | 0.9 | 0.8 | 0.8 | 0.3 | 0.8 | 0.8 | 0.7 | 0.4 | 0.9 | 1.0 |     |     |
|                       | P4 | 0.7                    | 0.9 | 0.9 | 0.7 | 0.8 | 0.9 | 0.9 | 0.9 | 0.8 | 1.0 | 0.9 | 0.8 | 0.9 | 0.8 | 0.9 | 0.7 | 1.0 | 0.9 | 1.0 |     |     |
|                       | P5 | 0.8                    | 0.9 | 0.9 | 0.9 | 0.6 | 0.7 | 0.9 | 0.9 | 1.0 | 1.0 | 0.9 | 0.8 | 1.0 | 0.9 | 0.8 | 0.9 | 0.7 | 1.0 | 0.9 | 1.0 |     |
|                       | P1 | 1.0                    | 0.6 | 0.6 | 1.0 | 0.1 | 0.3 | 0.3 | 0.6 | 1.0 | 0.8 | 0.7 | 1.0 | 0.7 | 0.8 | 0.7 | 1.0 | 0.9 | 0.7 | 0.8 | 0.7 | 1.0 |
|                       | P2 | 0.8                    | 0.9 | 1.0 | 1.0 | 0.8 | 0.7 | 0.8 | 1.0 | 1.0 | 1.0 | 0.9 | 1.0 | 1.0 | 0.9 | 0.7 | 1.0 | 0.9 | 0.7 | 1.0 | 0.9 | 0.8 |
|                       | P3 | 0.4                    | 1.0 | 1.0 | 0.9 | 0.5 | 0.9 | 0.8 | 0.8 | 0.6 | 0.9 | 0.8 | 0.8 | 0.3 | 0.8 | 0.8 | 0.7 | 0.4 | 0.9 | 1.0 |     |     |
|                       | P4 | 0.7                    | 0.9 | 0.9 | 0.7 | 0.8 | 0.9 | 0.9 | 0.9 | 0.8 | 1.0 | 0.9 | 0.8 | 0.9 | 0.8 | 0.9 | 0.7 | 1.0 | 0.9 | 1.0 |     |     |
|                       | P5 | 0.8                    | 0.9 | 0.9 | 0.9 | 0.6 | 0.7 | 0.9 | 0.9 | 1.0 | 1.0 | 0.9 | 0.8 | 1.0 | 0.9 | 0.8 | 0.9 | 0.7 | 1.0 | 0.9 | 1.0 |     |
|                       | P1 | 1.0                    | 0.6 | 0.6 | 1.0 | 0.1 | 0.3 | 0.3 | 0.6 | 1.0 | 0.8 | 0.7 | 1.0 | 0.7 | 0.8 | 0.7 | 1.0 | 0.9 | 0.7 | 0.8 | 0.7 | 1.0 |
|                       | P2 | 0.8                    | 0.9 | 1.0 | 1.0 | 0.8 | 0.7 | 0.8 | 1.0 | 1.0 | 1.0 | 0.9 | 1.0 | 1.0 | 0.9 | 0.7 | 1.0 | 0.9 | 0.7 | 1.0 | 0.9 | 0.8 |
|                       | P3 | 0.4                    | 1.0 | 1.0 | 0.9 | 0.5 | 0.9 | 0.8 | 0.8 | 0.6 | 0.9 | 0.8 | 0.8 | 0.3 | 0.8 | 0.8 | 0.7 | 0.4 | 0.9 | 1.0 |     |     |
|                       | P4 | 0.7                    | 0.9 | 0.9 | 0.7 | 0.8 | 0.9 | 0.9 | 0.9 | 0.8 | 1.0 | 0.9 | 0.8 | 0.9 | 0.8 | 0.9 | 0.7 | 1.0 | 0.9 | 1.0 |     |     |
|                       | P5 | 0.8                    | 0.9 | 0.9 | 0.9 | 0.6 | 0.7 | 0.9 | 0.9 | 1.0 | 1.0 | 0.9 | 0.8 | 1.0 | 0.9 | 0.8 | 0.9 | 0.7 | 1.0 | 0.9 | 1.0 |     |
|                       | P1 | 1.0                    | 0.6 | 0.6 | 1.0 | 0.1 | 0.3 | 0.3 | 0.6 | 1.0 | 0.8 | 0.7 | 1.0 | 0.7 | 0.8 | 0.7 | 1.0 | 0.9 | 0.7 | 0.8 | 0.7 | 1.0 |
|                       | P2 | 0.8                    | 0.9 | 1.0 | 1.0 | 0.8 | 0.7 | 0.8 | 1.0 | 1.0 | 1.0 | 0.9 | 1.0 | 1.0 | 0.9 | 0.7 | 1.0 | 0.9 | 0.7 | 1.0 | 0.9 | 0.8 |
|                       | P3 | 0.4                    | 1.0 | 1.0 | 0.9 | 0.5 | 0.9 | 0.8 | 0.8 | 0.6 | 0.9 | 0.8 | 0.8 | 0.3 | 0.8 | 0.8 | 0.7 | 0.4 | 0.9 | 1.0 |     |     |
|                       | P4 | 0.7                    | 0.9 | 0.9 | 0.7 | 0.8 | 0.9 | 0.9 | 0.9 | 0.8 | 1.0 | 0.9 | 0.8 | 0.9 | 0.8 | 0.9 | 0.7 | 1.0 | 0.9 | 1.0 |     |     |
|                       | P5 | 0.8                    | 0.9 | 0.9 | 0.9 | 0.6 | 0.7 | 0.9 | 0.9 | 1.0 | 1.0 | 0.9 | 0.8 | 1.0 | 0.9 | 0.8 | 0.9 | 0.7 | 1.0 | 0.9 | 1.0 |     |
|                       | P1 | 1.0                    | 0.6 | 0.6 | 1.0 | 0.1 | 0.3 | 0.3 | 0.6 | 1.0 | 0.8 | 0.7 | 1.0 | 0.7 | 0.8 | 0.7 | 1.0 | 0.9 | 0.7 | 0.8 | 0.7 | 1.0 |
|                       | P2 | 0.8                    | 0.9 | 1.0 | 1.0 | 0.8 | 0.7 | 0.8 | 1.0 | 1.0 | 1.0 | 0.9 | 1.0 | 1.0 | 0.9 | 0.7 | 1.0 | 0.9 | 0.7 | 1.0 | 0.9 | 0.8 |
|                       | P3 | 0.4                    | 1.0 | 1.0 | 0.9 | 0.5 | 0.9 | 0.8 | 0.8 | 0.6 | 0.9 | 0.8 | 0.8 | 0.3 | 0.8 | 0.8 | 0.7 | 0.4 | 0.9 | 1.0 |     |     |
|                       | P4 | 0.7                    | 0.9 | 0.9 | 0.7 | 0.8 | 0.9 | 0.9 | 0.9 | 0.8 | 1.0 | 0.9 | 0.8 | 0.9 | 0.8 | 0.9 | 0.7 | 1.0 | 0.9 | 1.0 |     |     |
|                       | P5 | 0.8                    | 0.9 | 0.9 | 0.9 | 0.6 | 0.7 | 0.9 | 0.9 | 1.0 | 1.0 | 0.9 | 0.8 | 1.0 | 0.9 | 0.8 | 0.9 | 0.7 | 1.0 | 0.9 | 1.0 |     |
|                       | P1 | 1.0                    | 0.6 | 0.6 | 1.0 | 0.1 | 0.3 | 0.3 | 0.6 | 1.0 | 0.8 | 0.7 | 1.0 | 0.7 | 0.8 | 0.7 | 1.0 | 0.9 | 0.7 | 0.8 | 0.7 | 1.0 |
|                       | P2 | 0.8                    | 0.9 | 1.0 | 1.0 | 0.8 | 0.7 | 0.8 | 1.0 | 1.0 | 1.0 | 0.9 | 1.0 | 1.0 | 0.9 | 0   |     |     |     |     |     |     |
